# Supplementary material for: Genetic diversity of trypanosome species in tsetse flies (Glossina spp.) in Nigeria
Source: PubMed Central journal article supplement (PMC6792248; doi:10.1186/s13071-019-3718-y), 2019-10-14

**Yankari GR**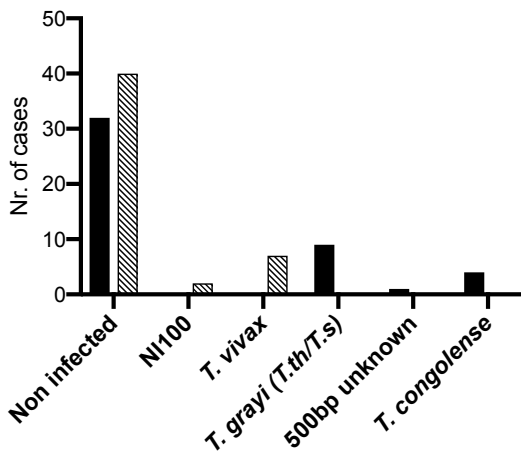**Kainji Lake NP**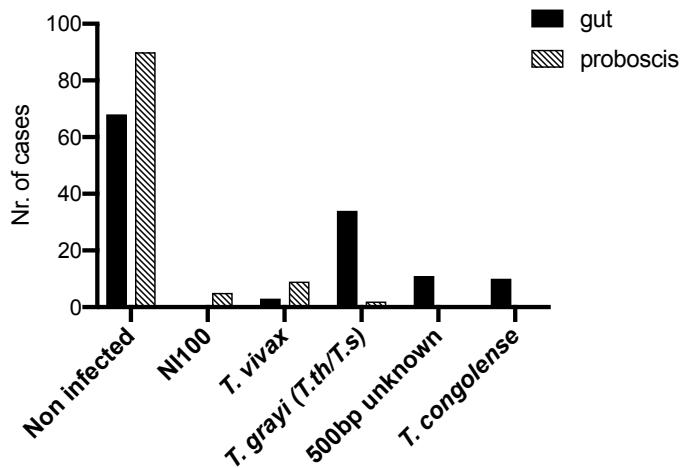**Old Oyo NP**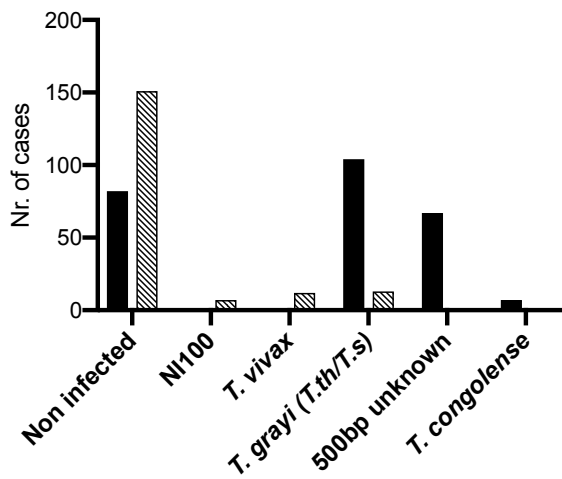**Cross River NP**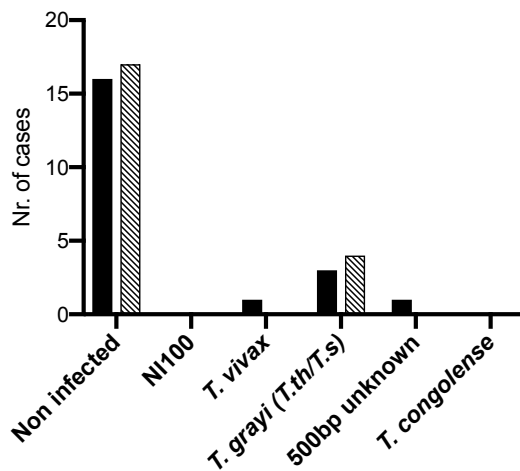**Ijah Gwari I (03/14)**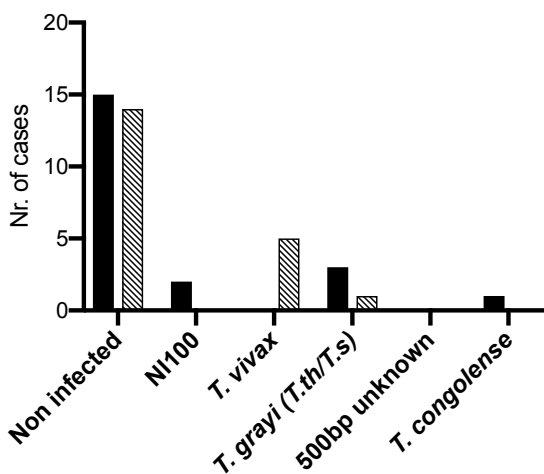**Ijah Gwari II (12/14)**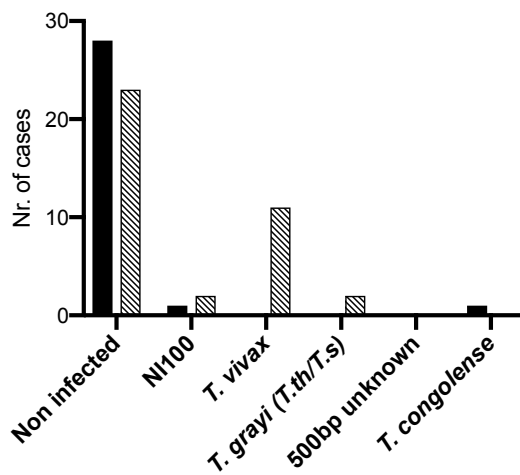

Supplement: 13071_2019_3718_MOESM2_ESM.pdf [file 13071_2019_3718_MOESM2_ESM.pdf]
